# Supplementary material for: Artificial Intelligence Search Strategies for Autonomous Underwater Vehicles Applied for Submarine Groundwater Discharge Site Investigation
Source: MDPI journal article supplement (doi:10.3390/jmse10010007), 2021-12-22
Supplement: s1 [file s1]

Archive with 3 entries (3 files):
- S1 Environment_Tidal_Cycle.avi
- S2 Waterfall diagrams.pdf
- S3 AUV_Paths.pdf
