# Supplementary figures and images for: Artificial Intelligence Search Strategies for Autonomous Underwater Vehicles Applied for Submarine Groundwater Discharge Site Investigation
Source: MDPI journal article supplement (doi:10.3390/jmse10010007), 2021-12-22

## S2 Waterfall diagrams

### Static combination

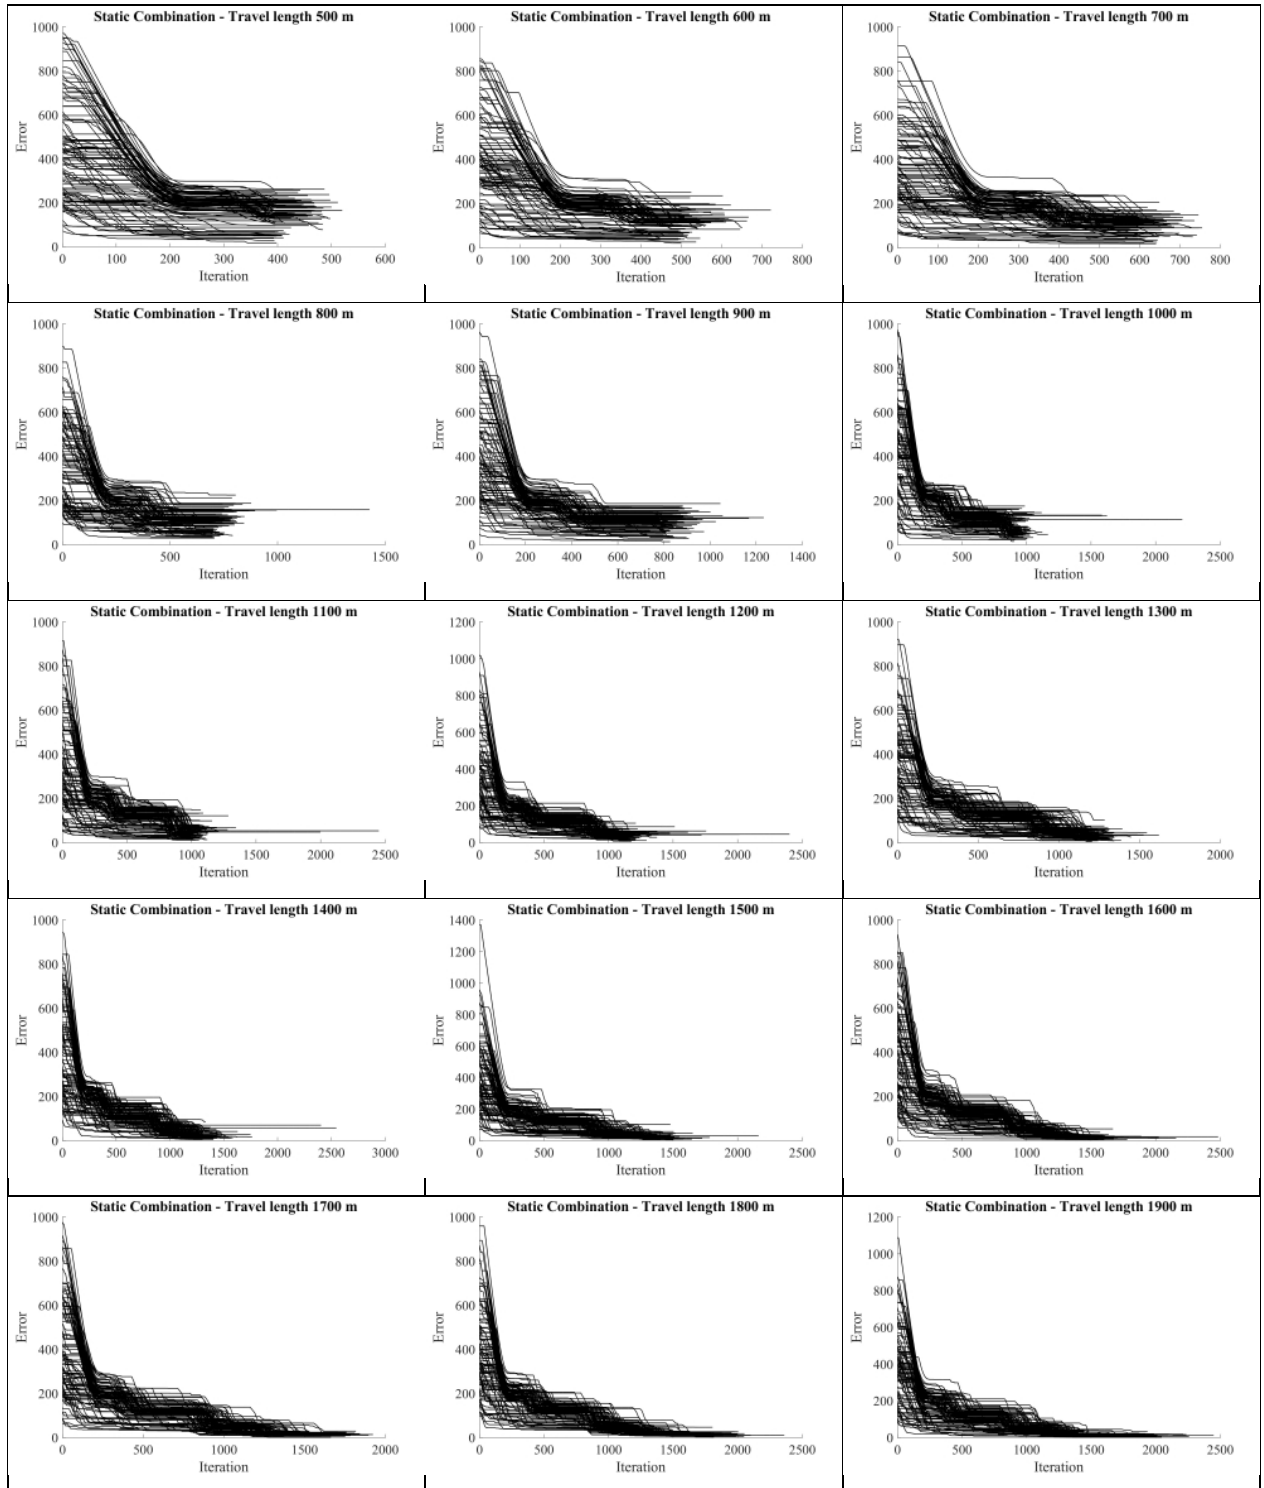



## Dynamic search strategy selection

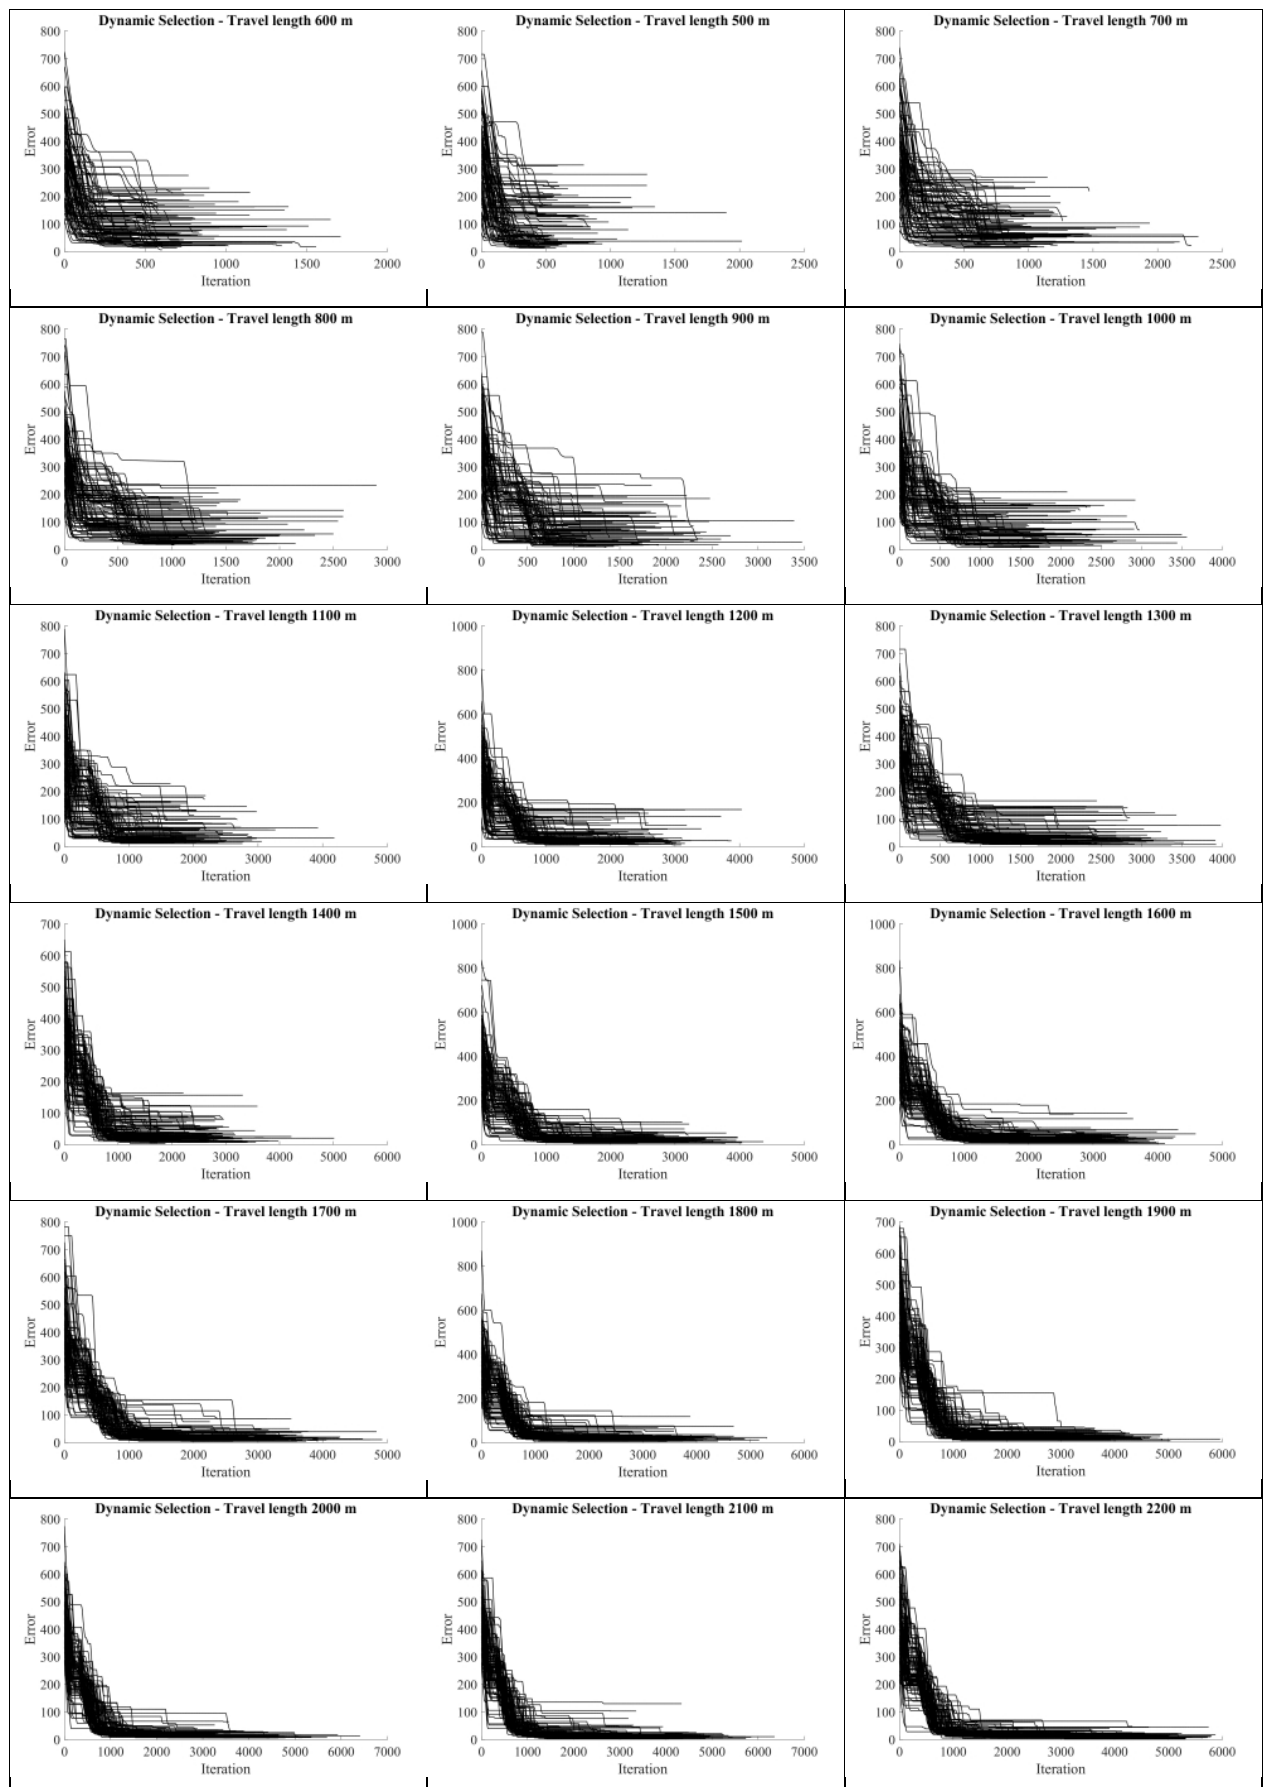

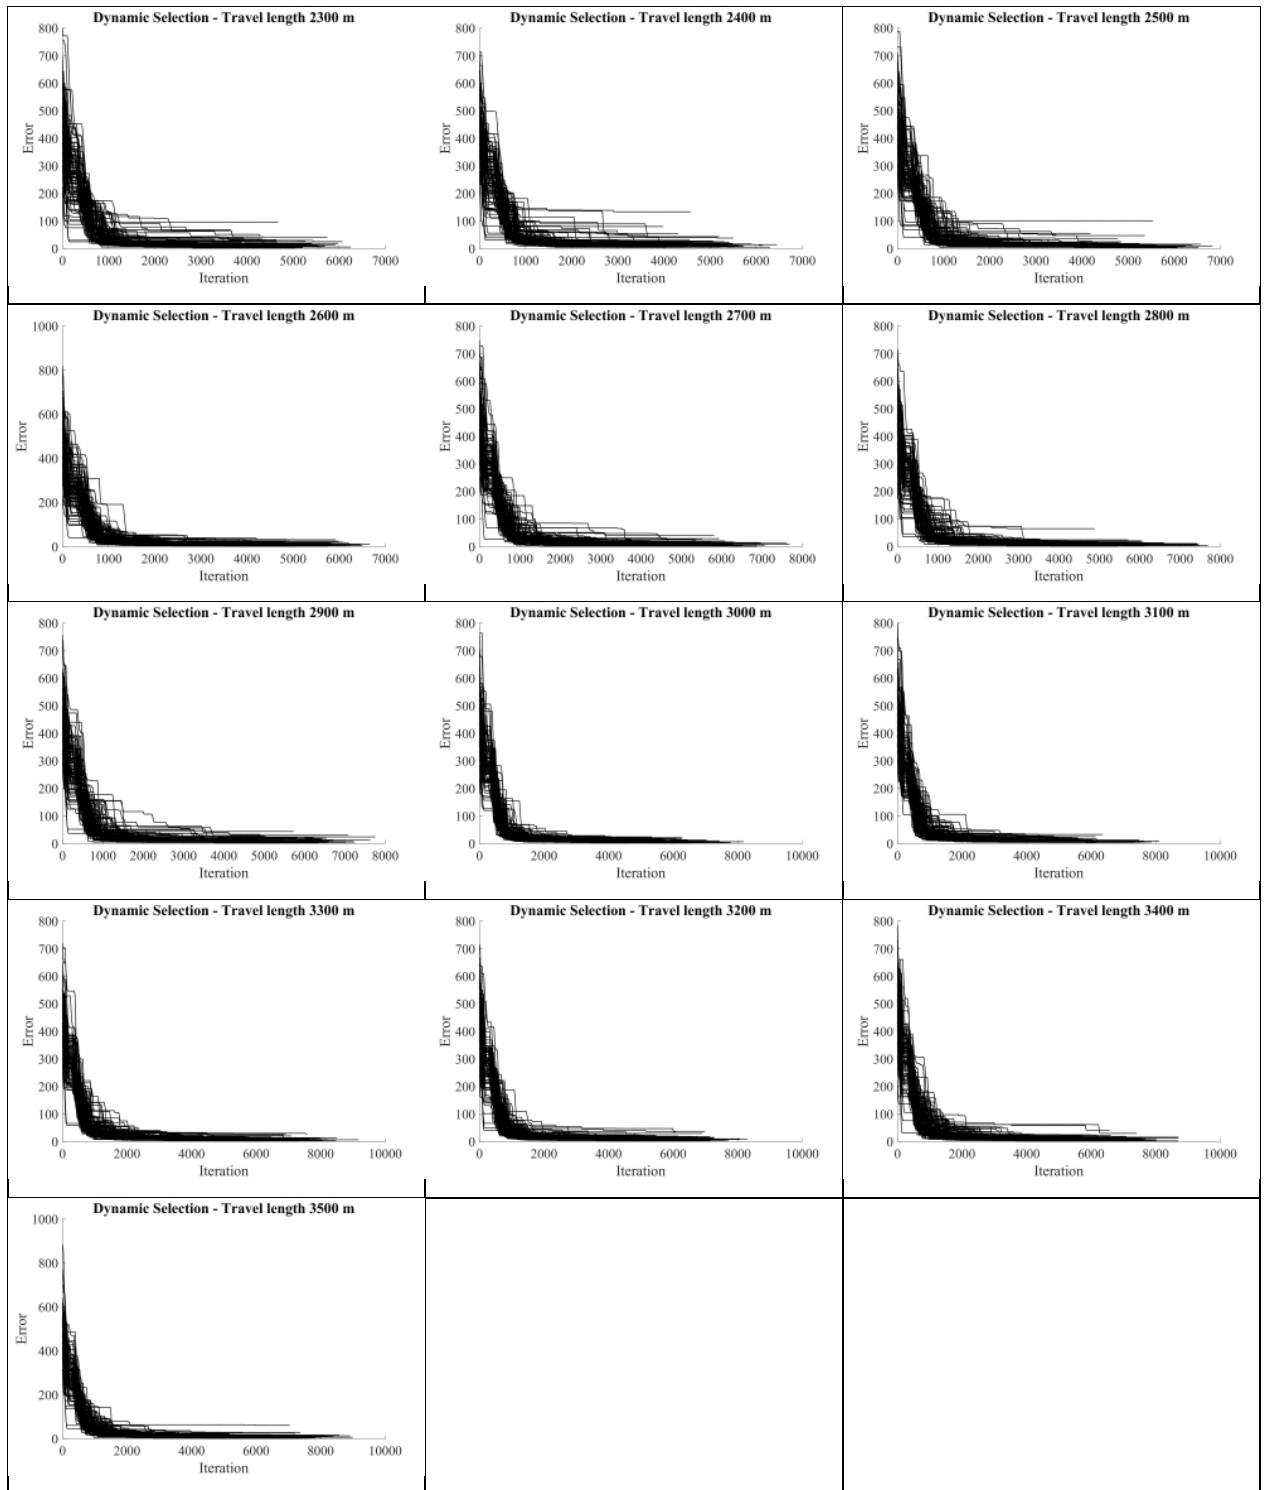

Supplement: s1 [file s1 › S2 Waterfall diagrams.pdf]

## S3 AUV Paths

### Static combination

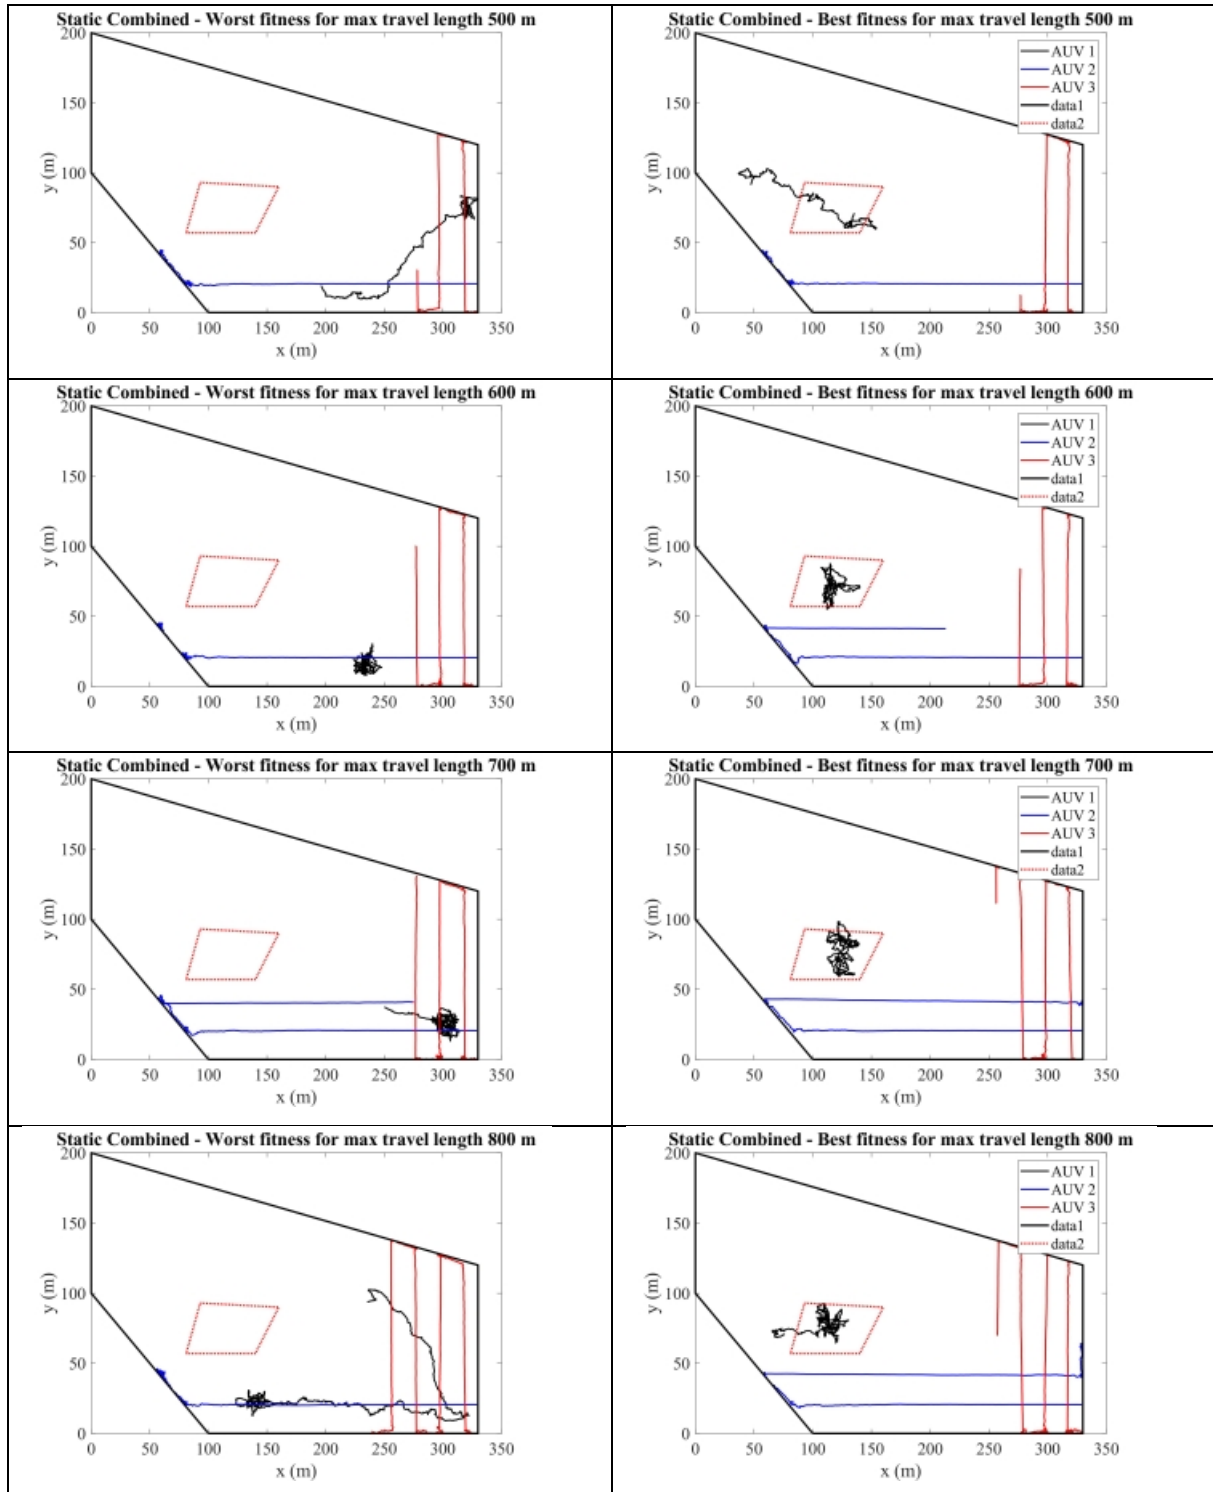

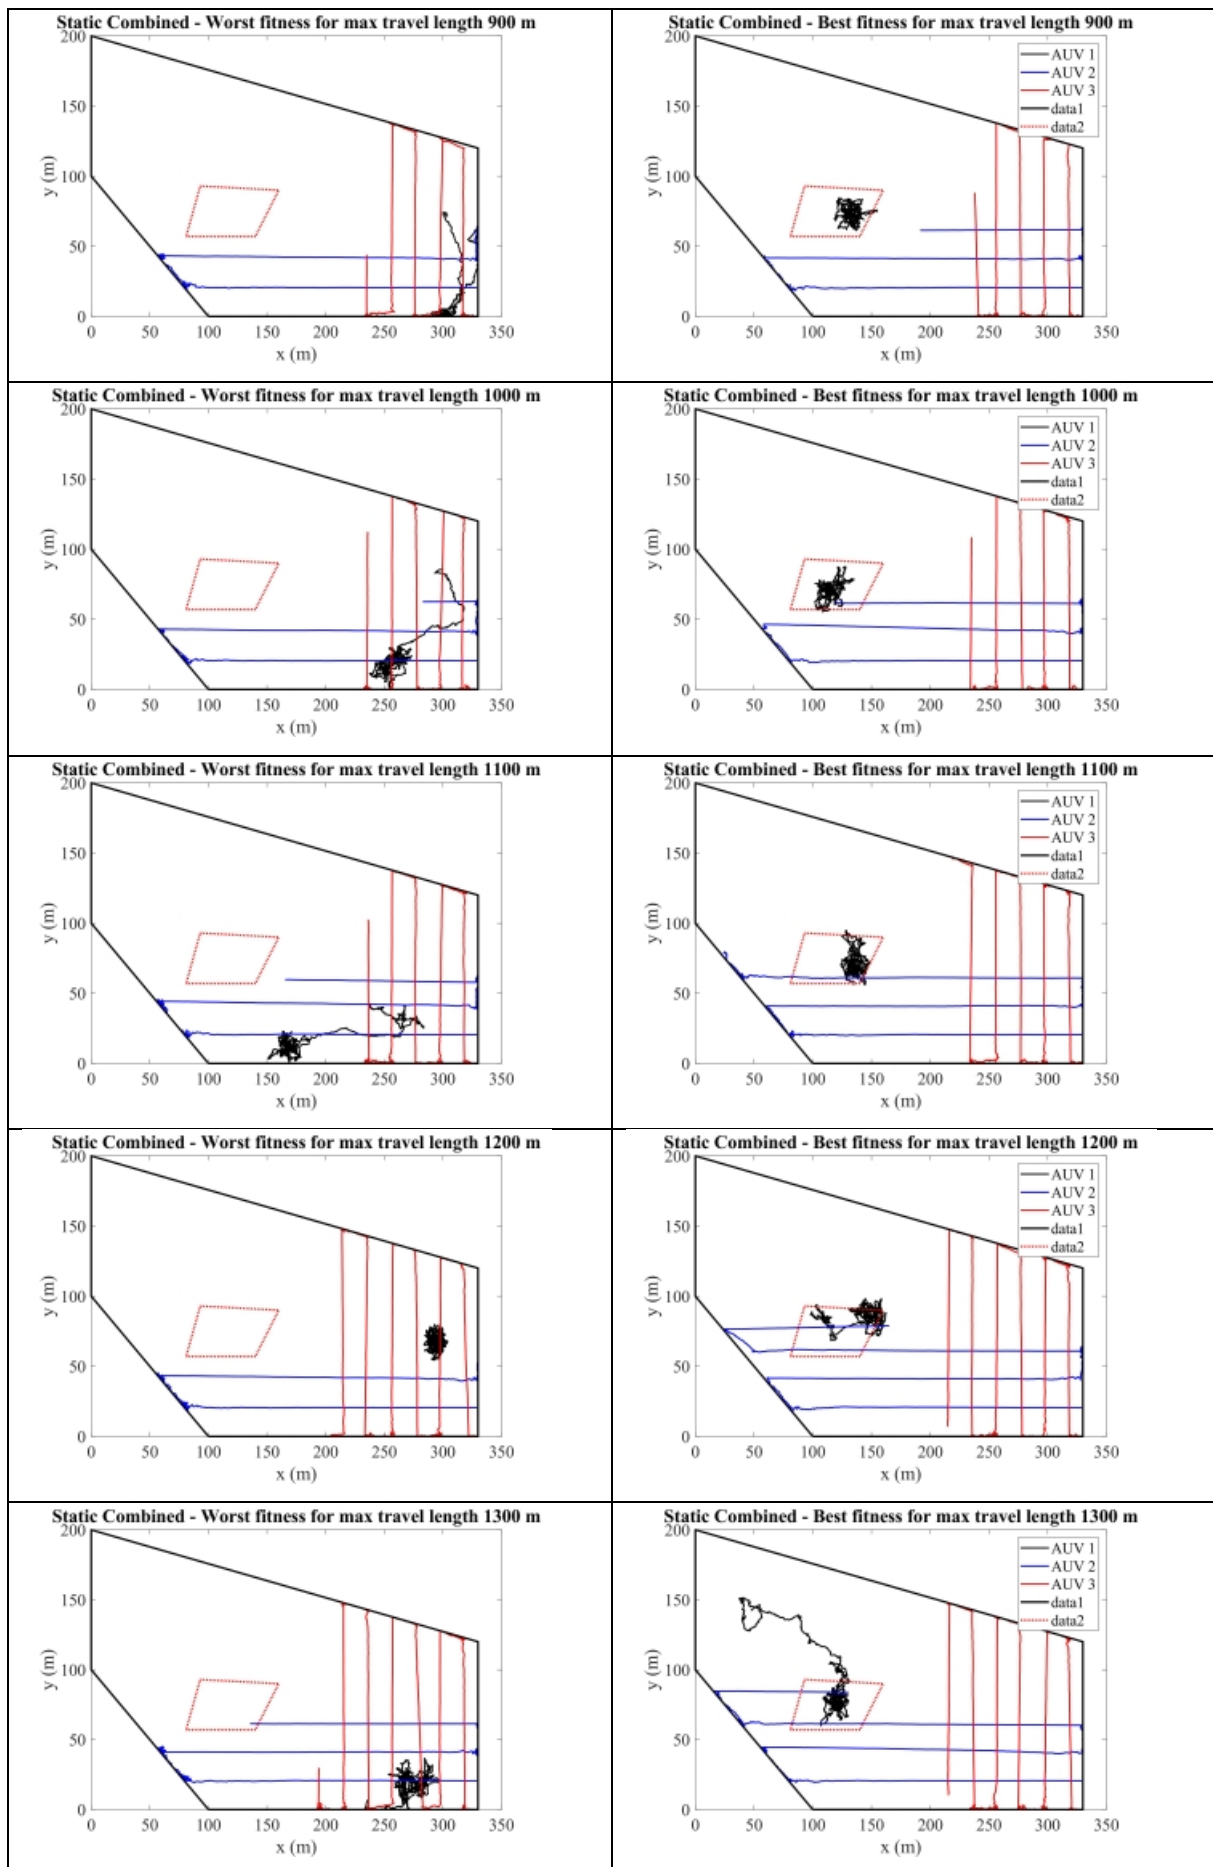

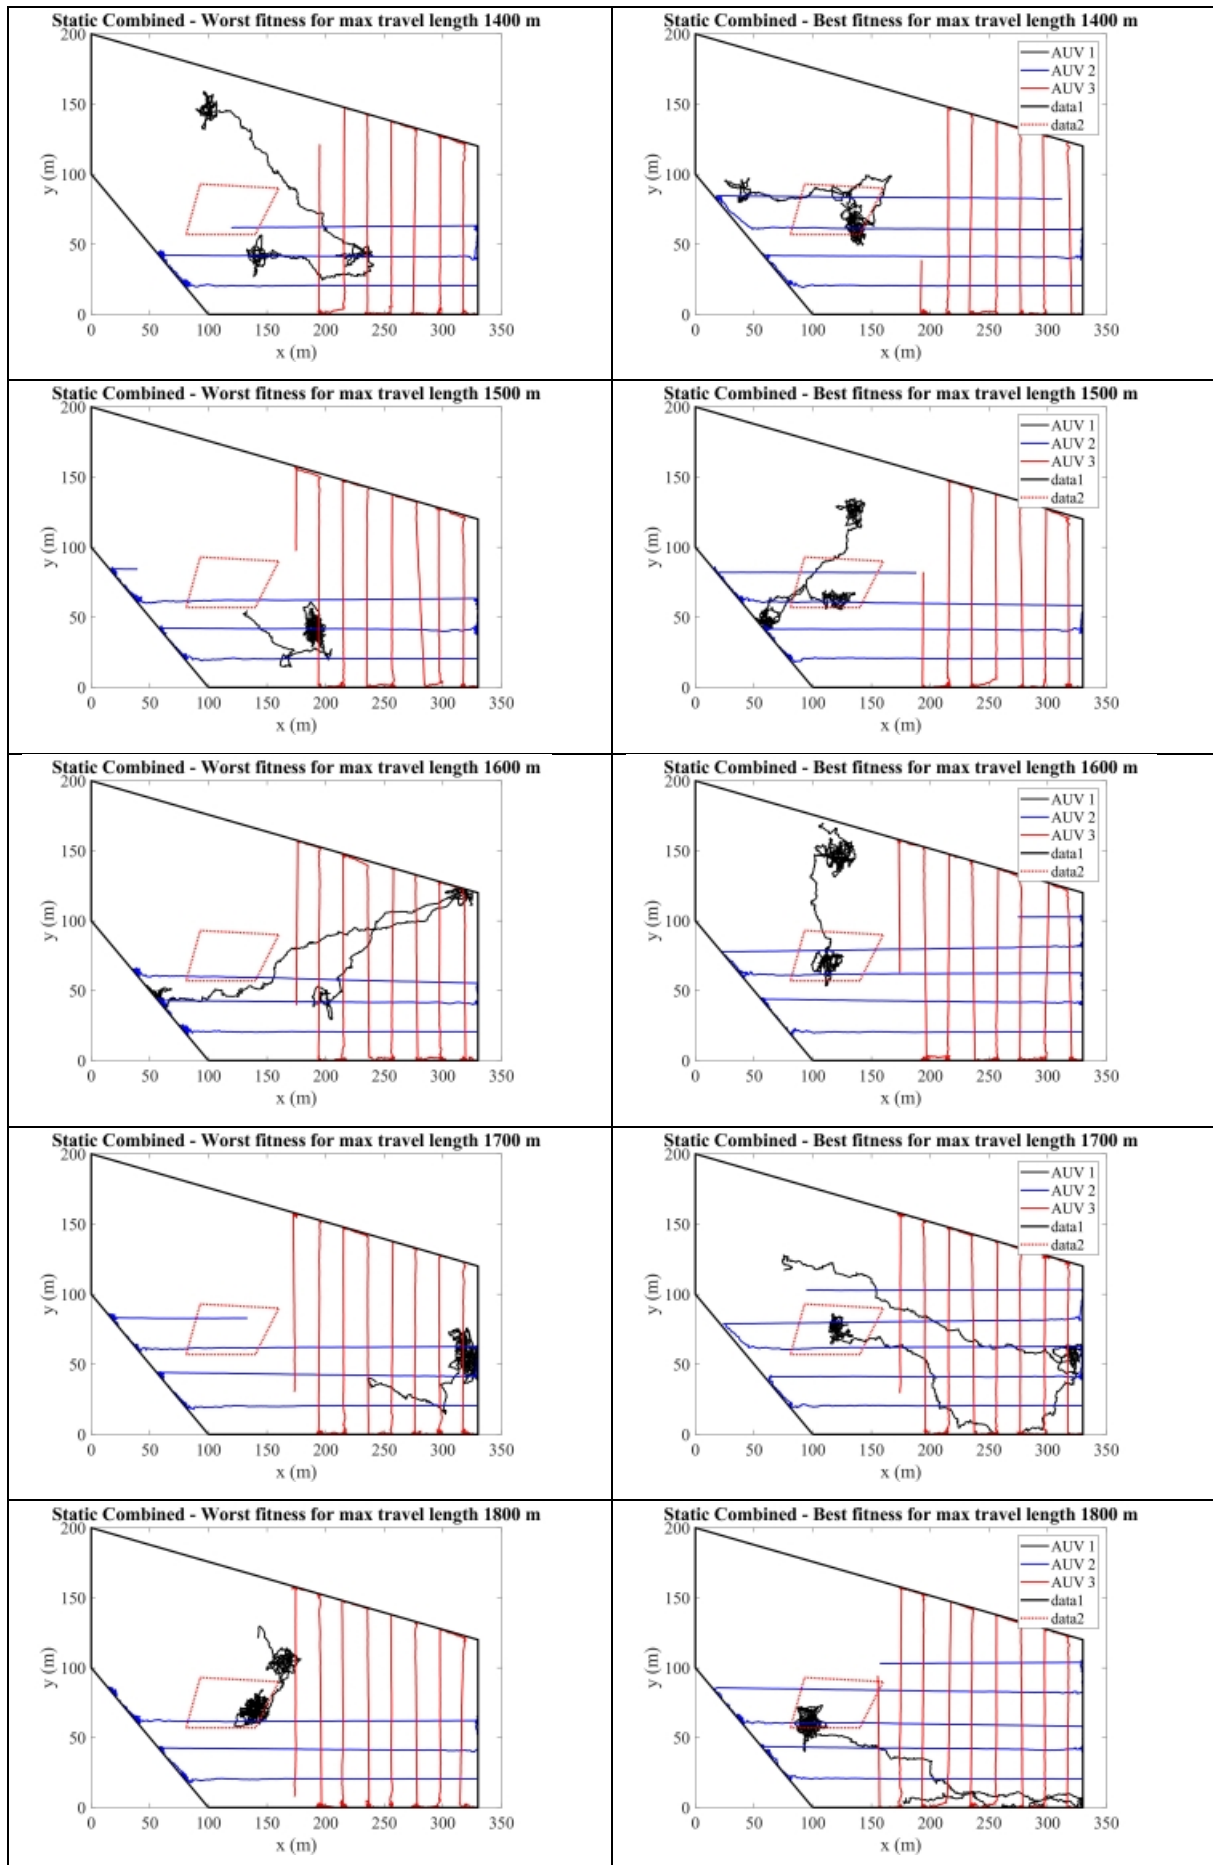

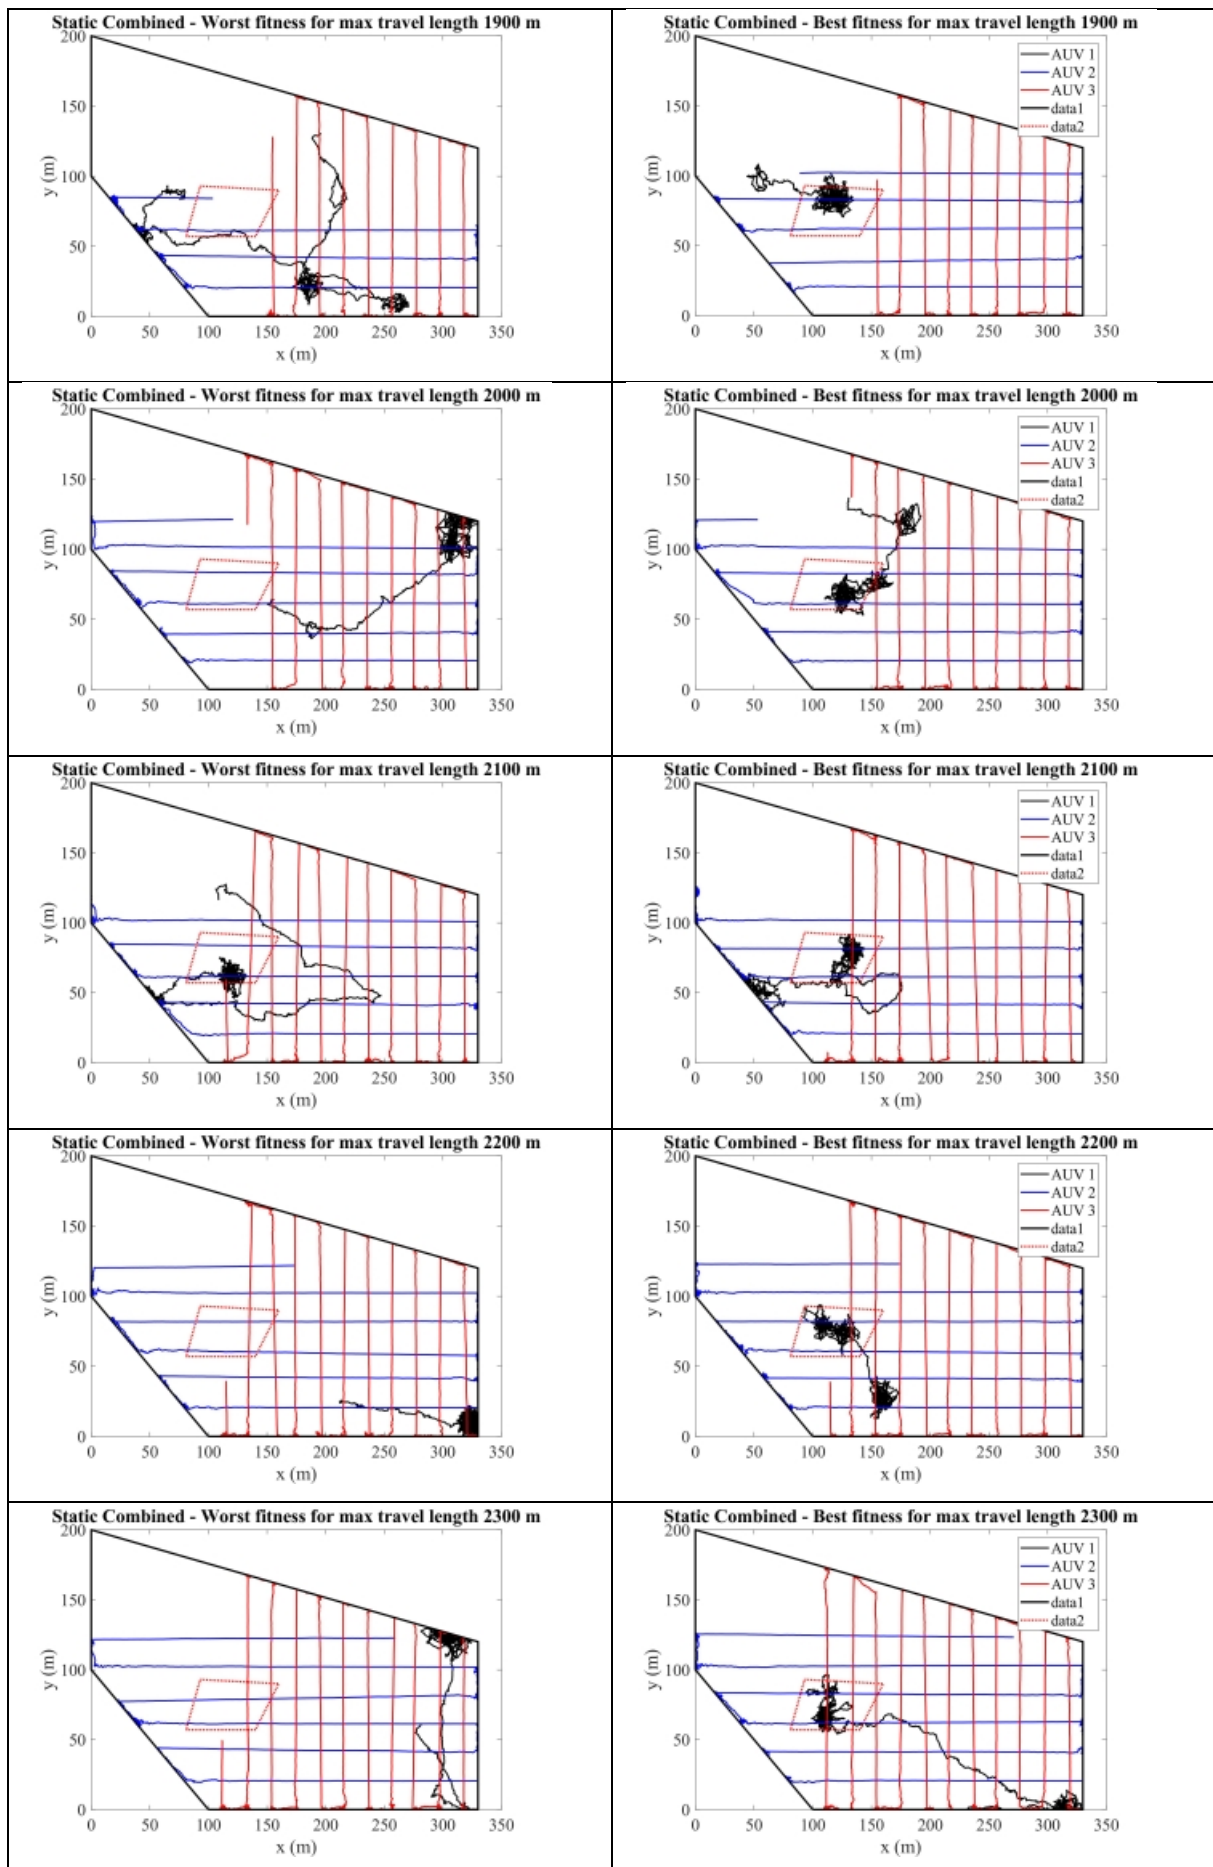

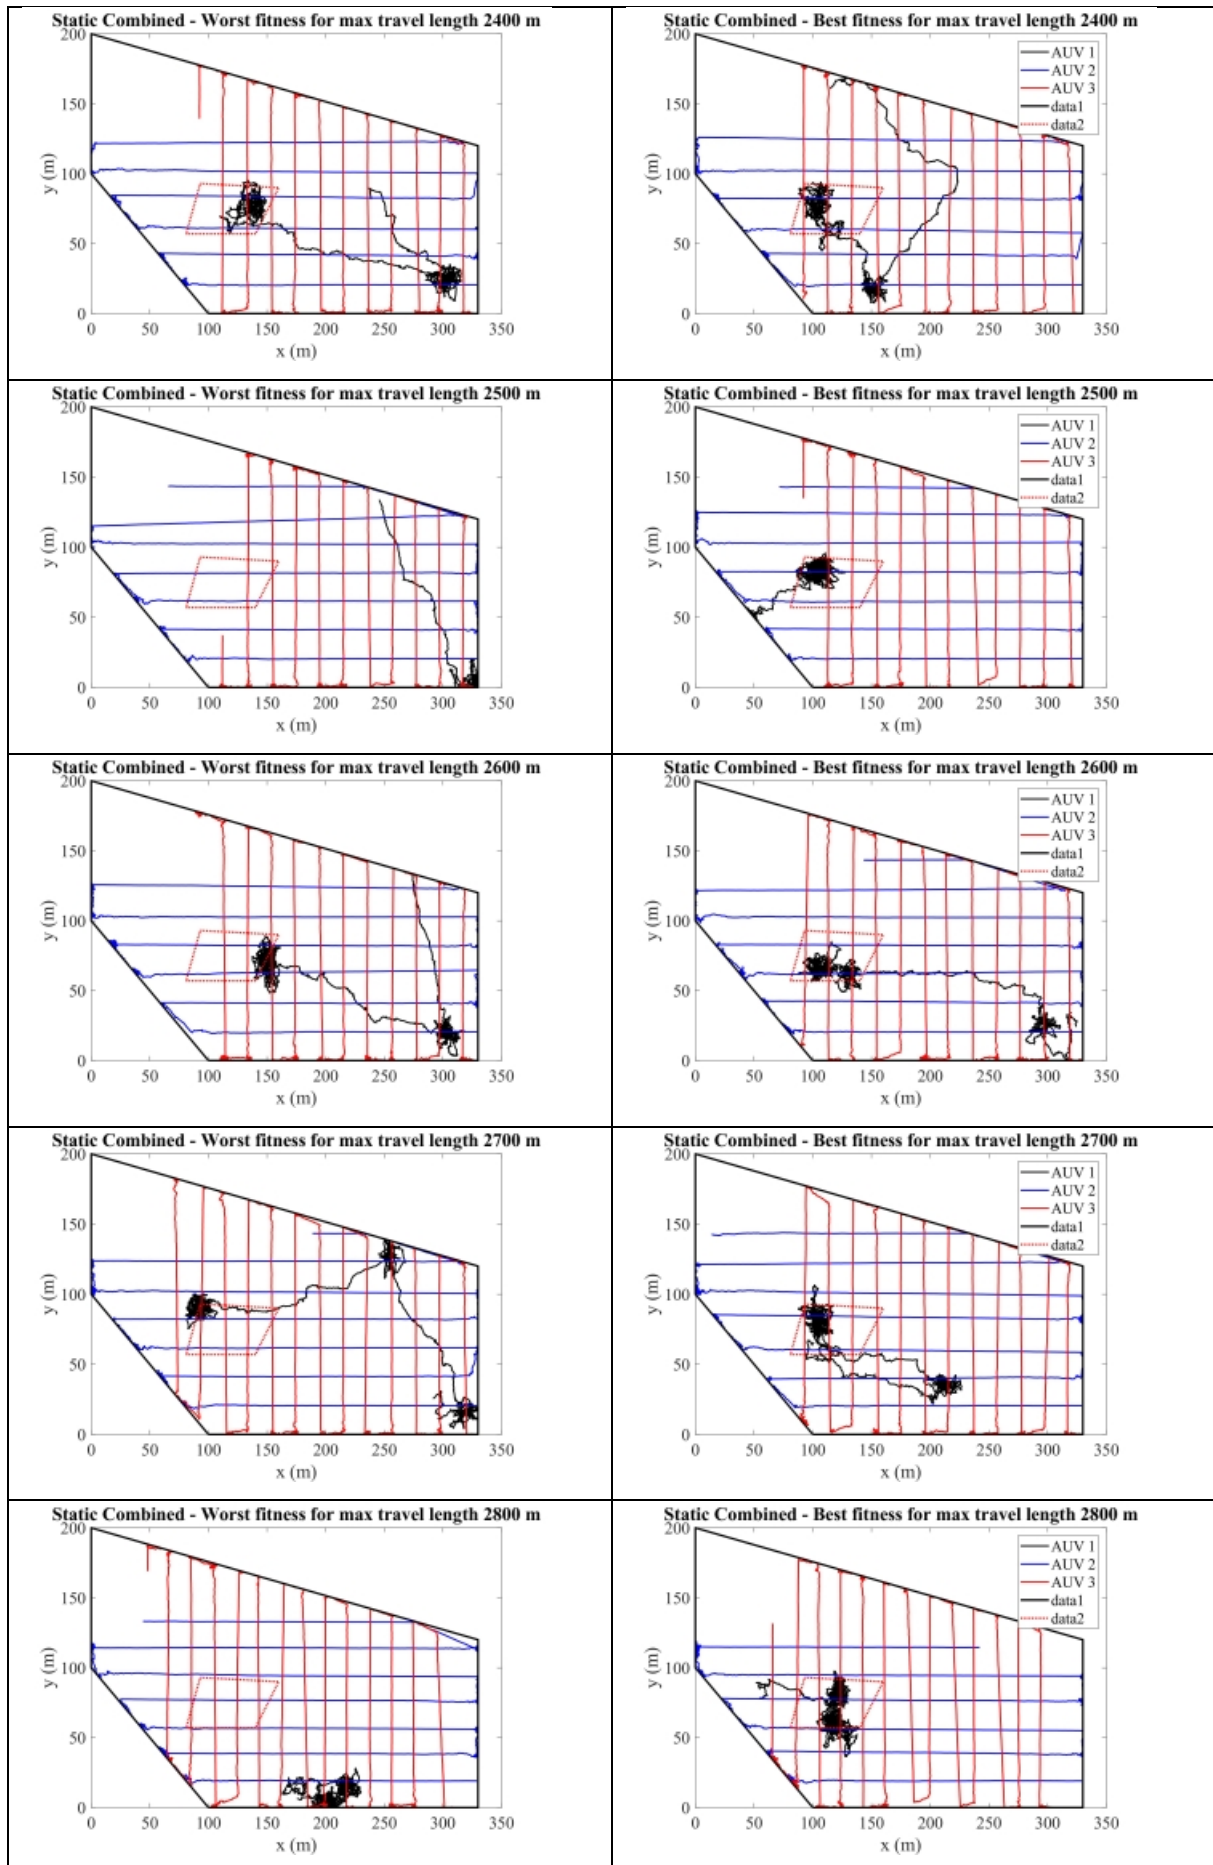

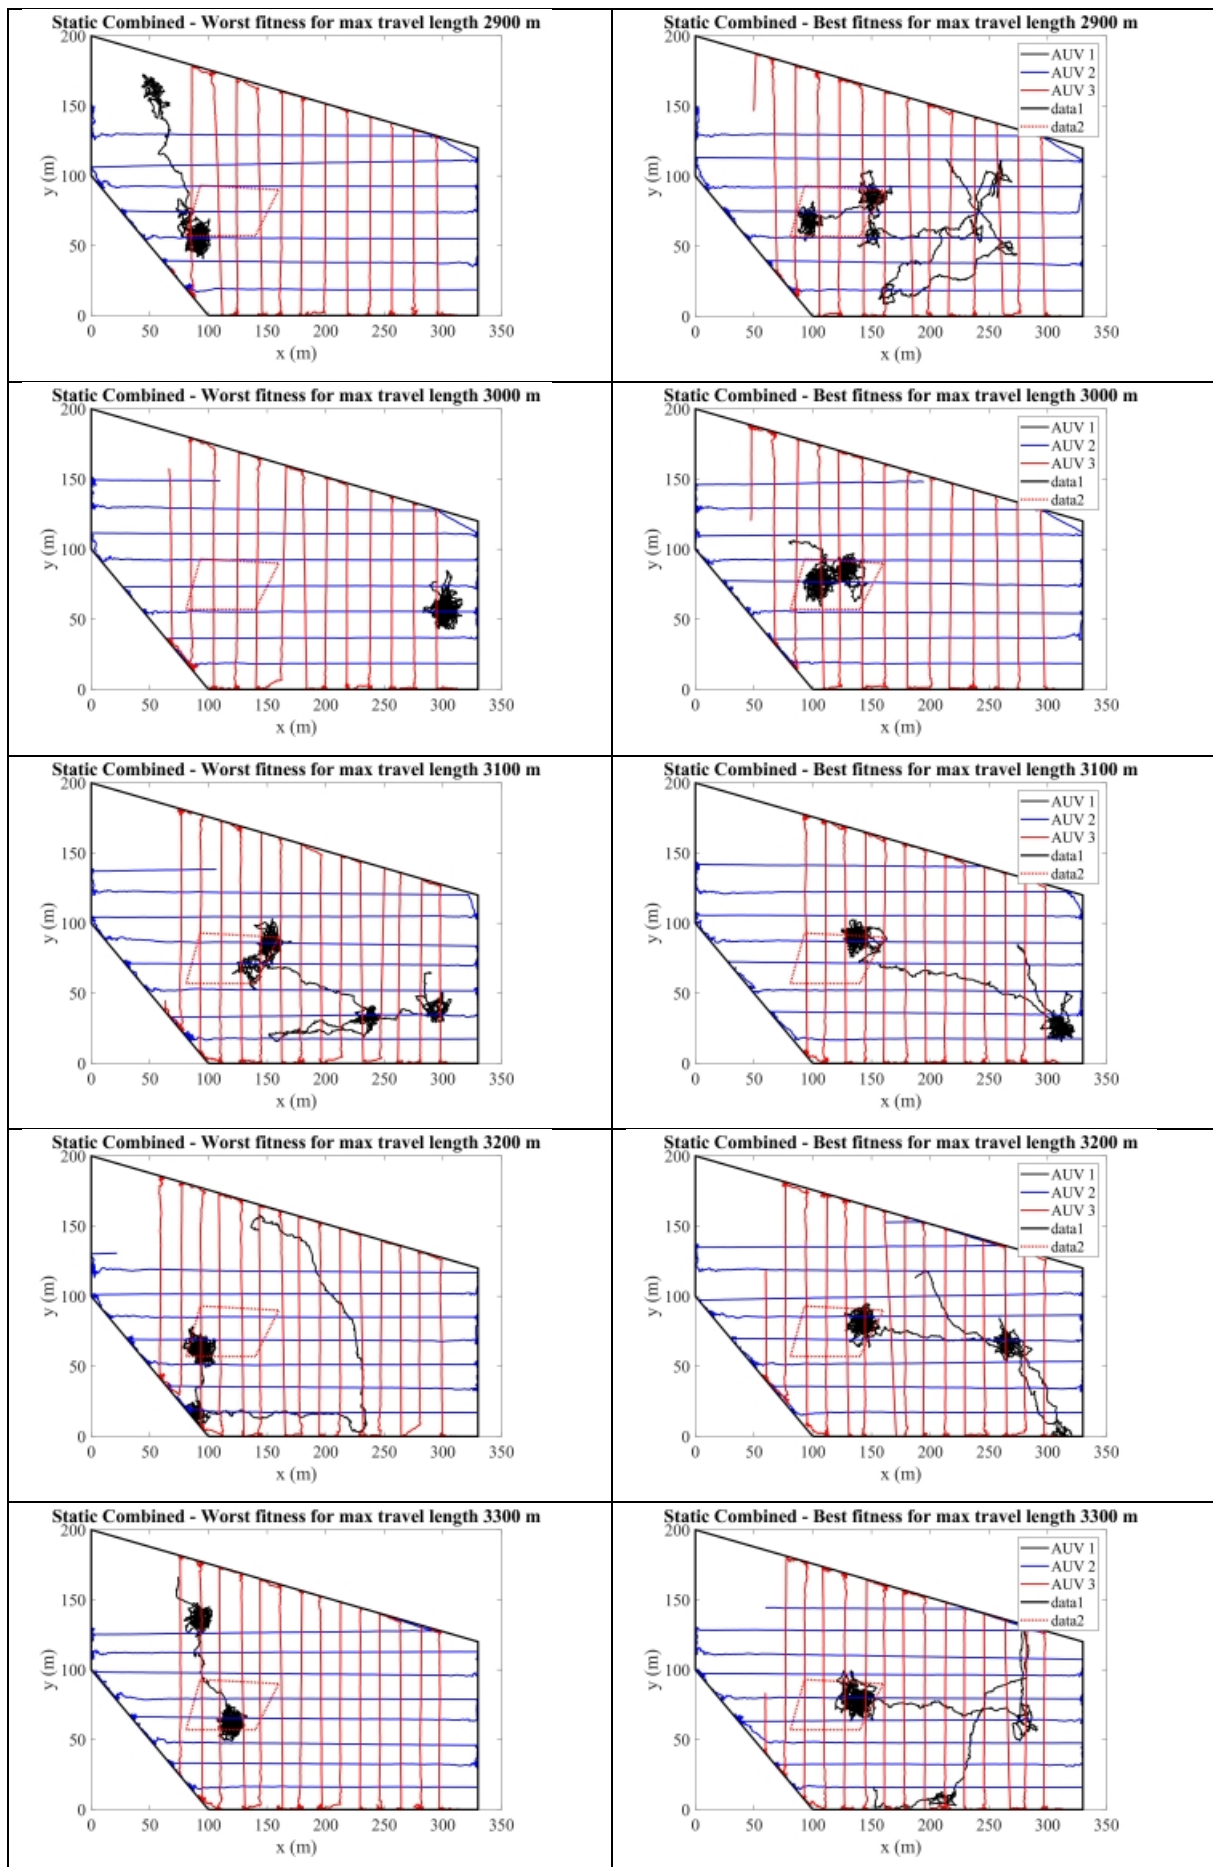

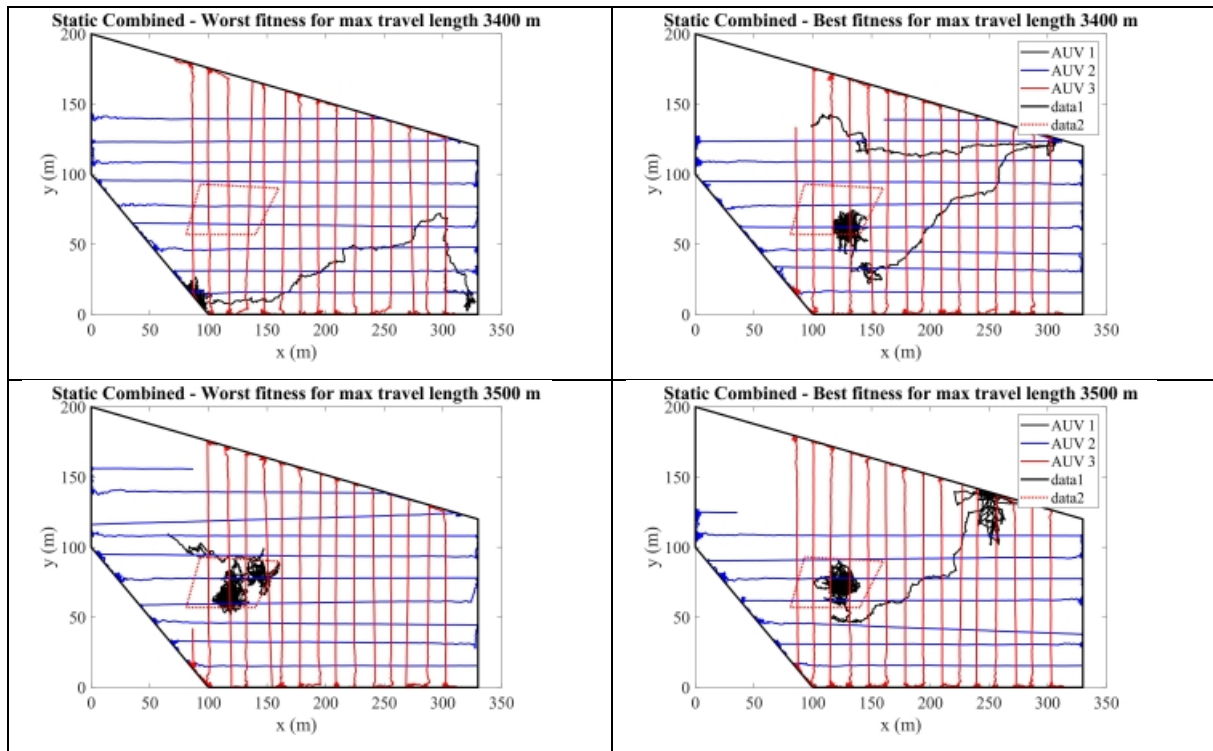

## Dynamic search strategy selection

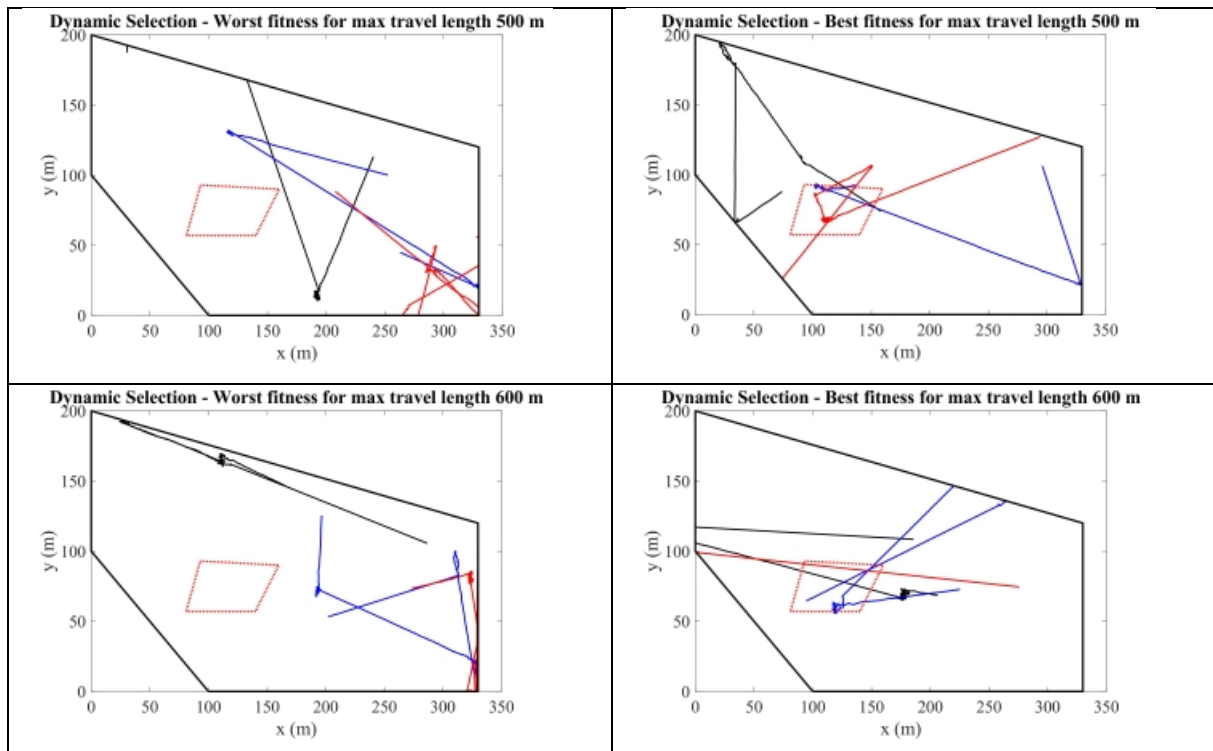

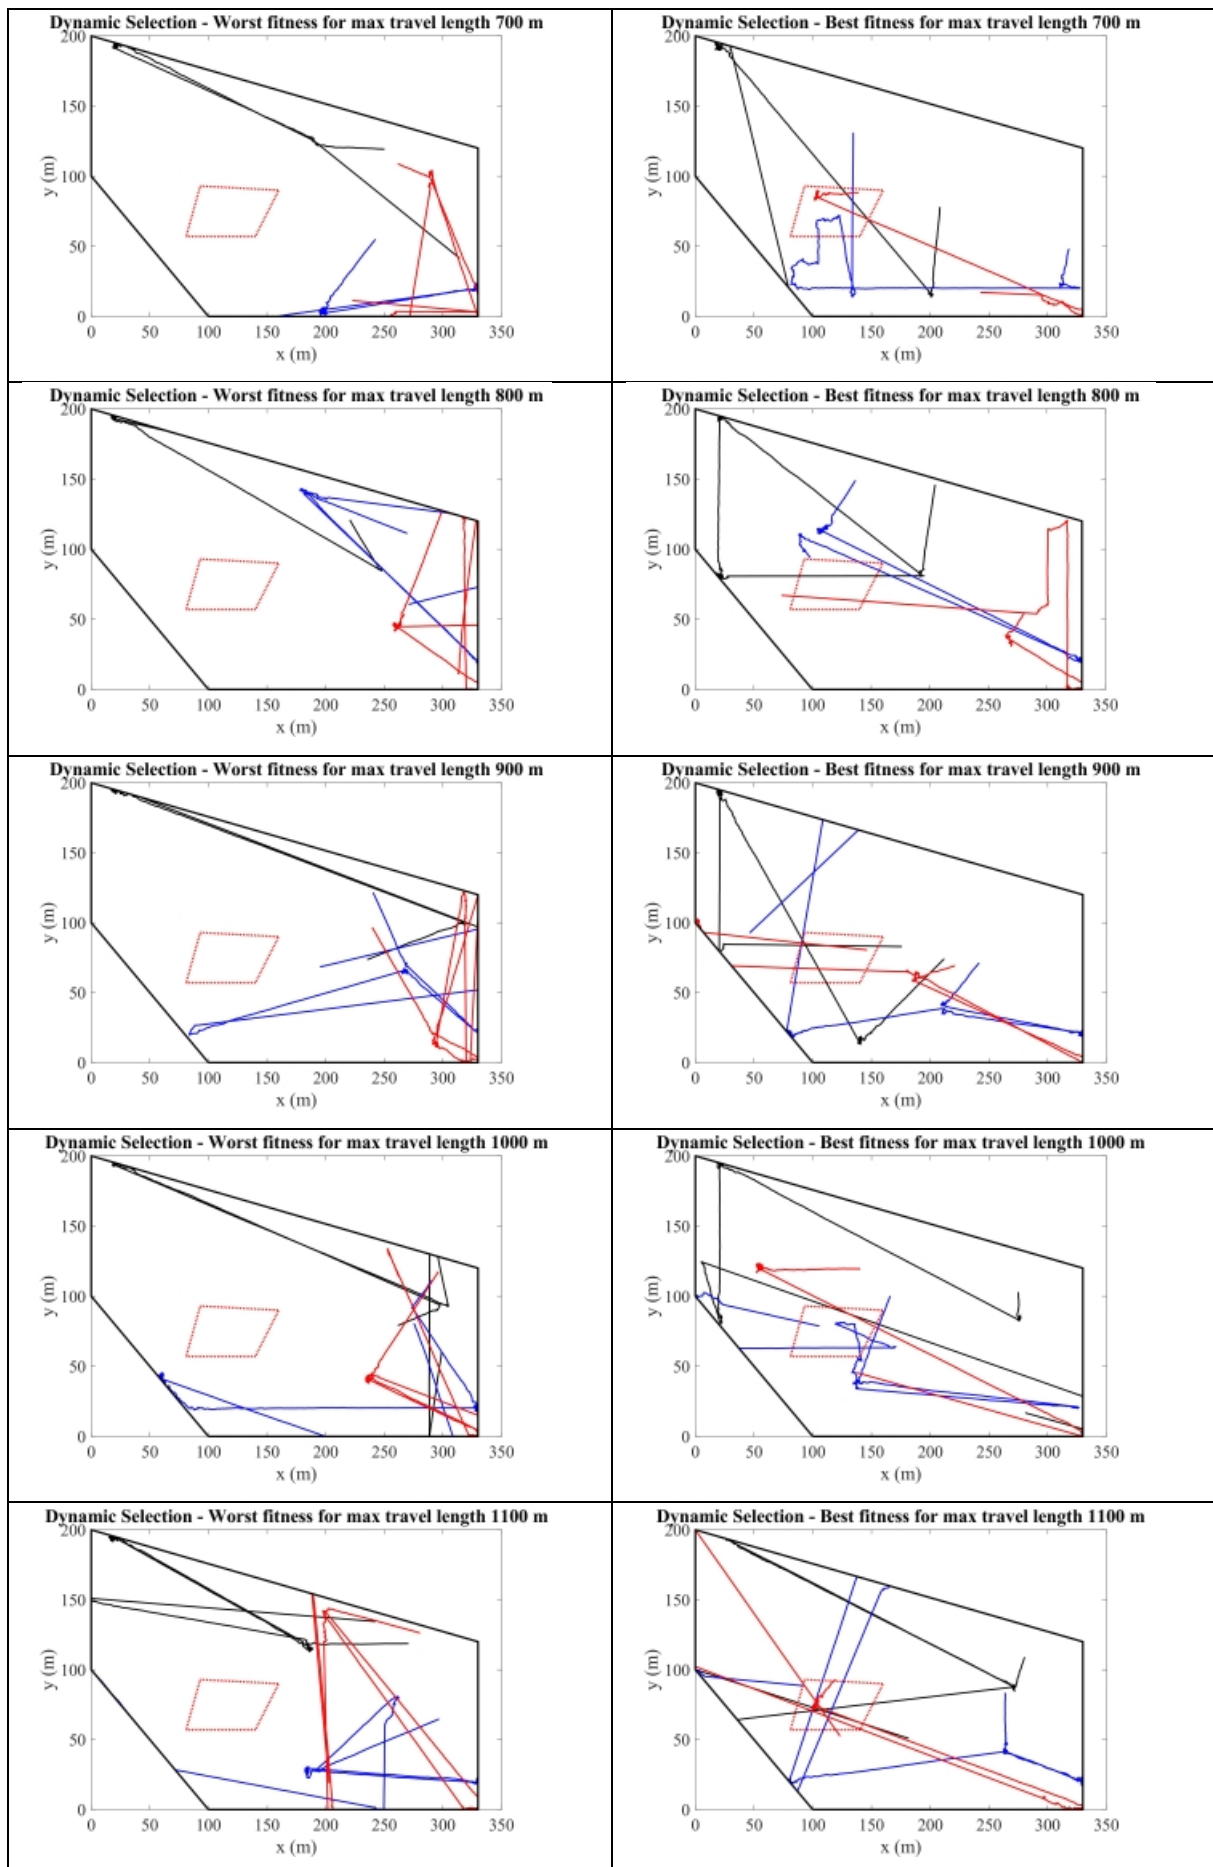

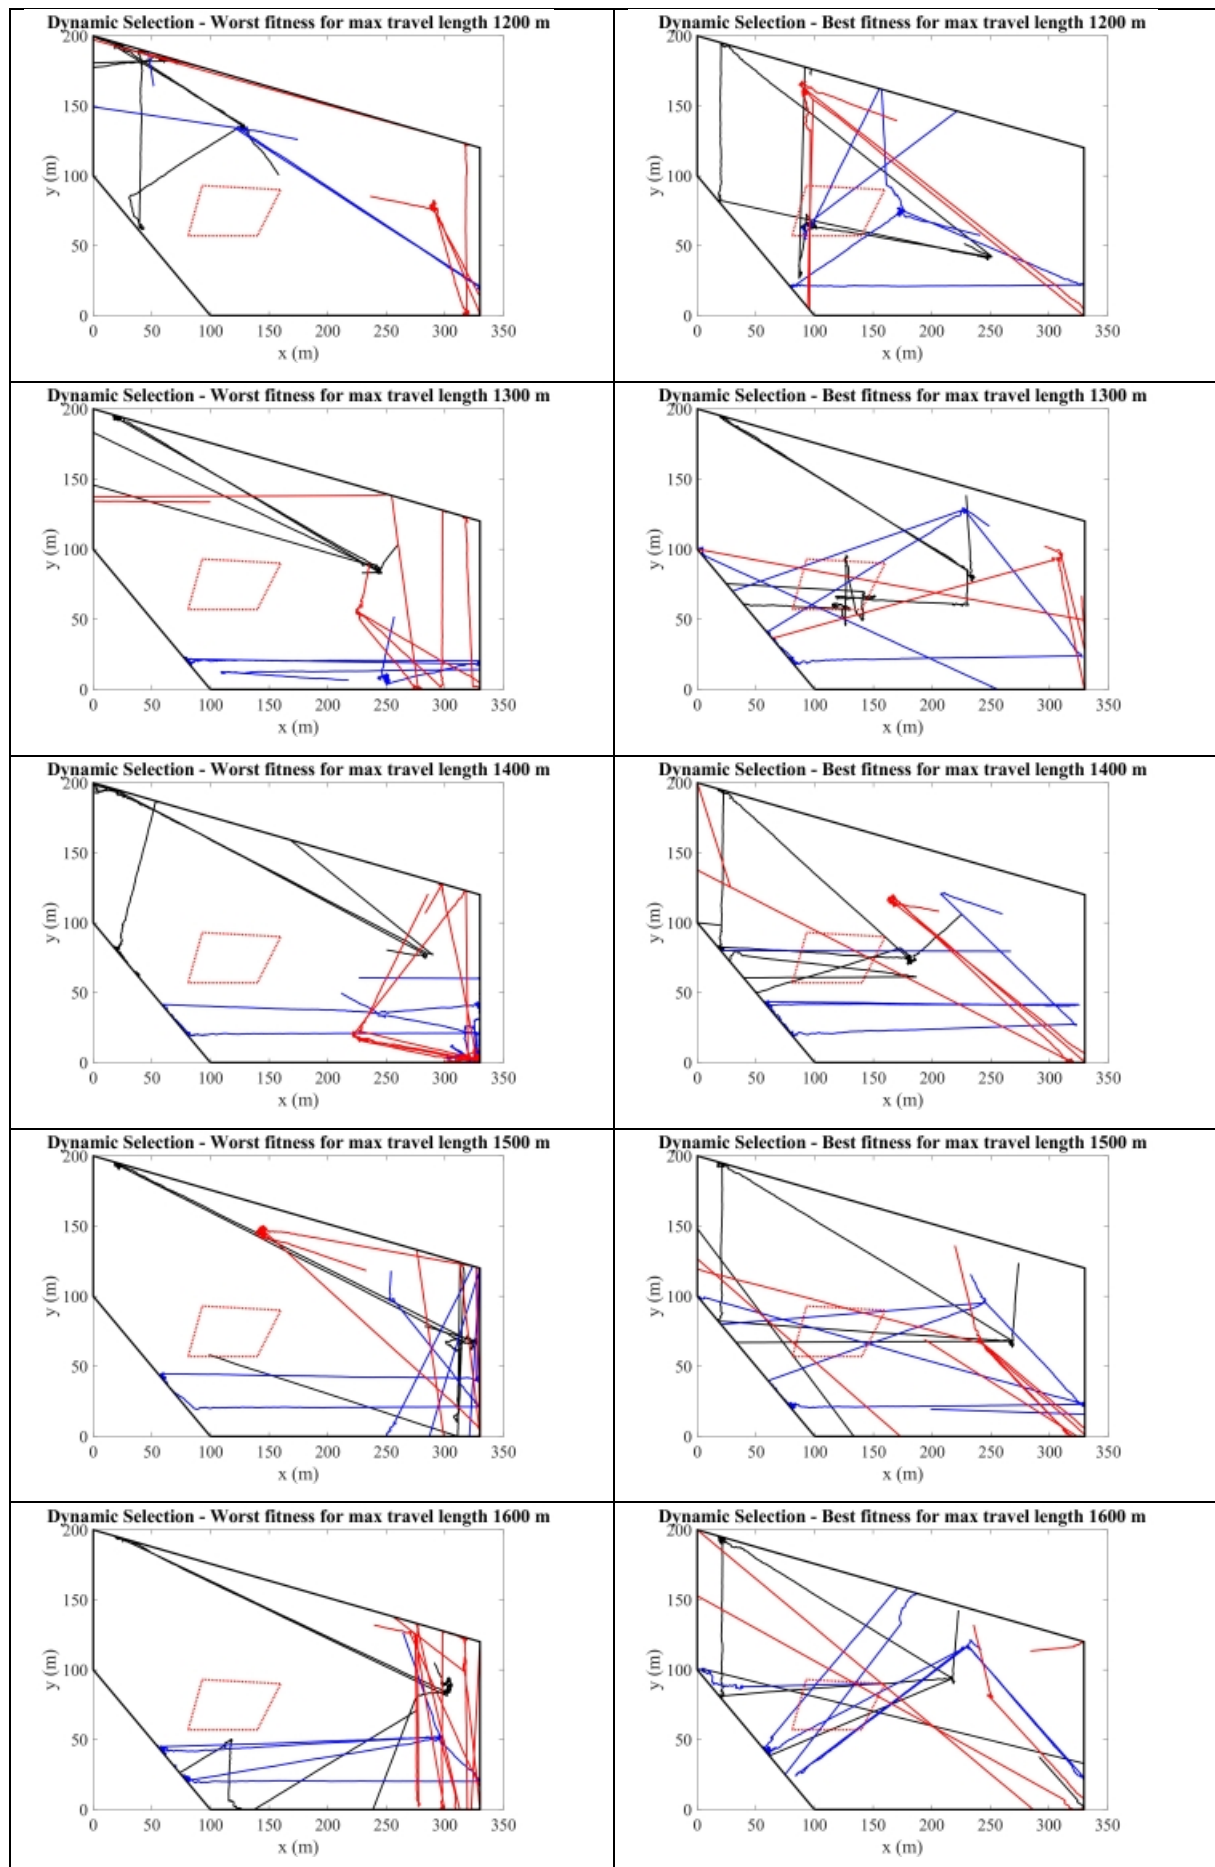

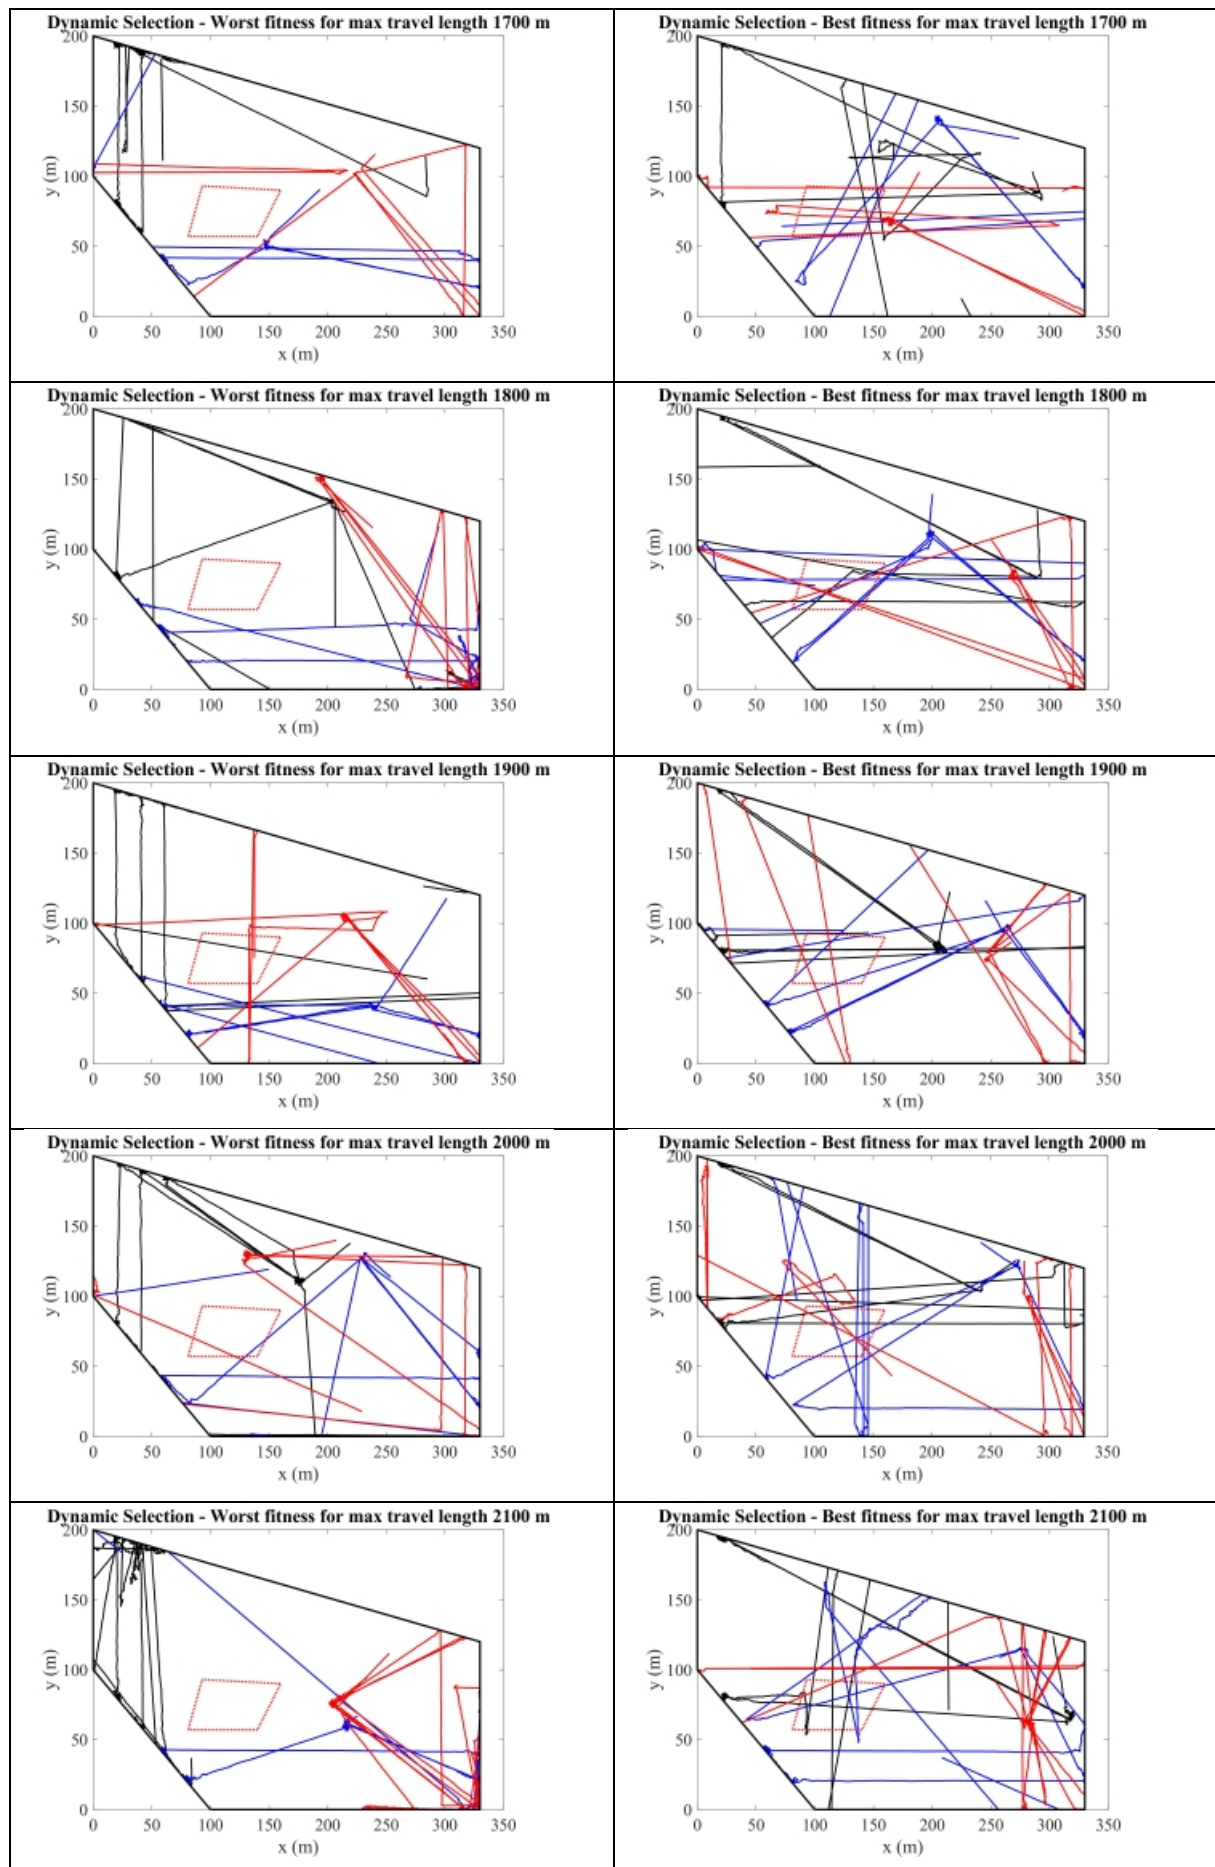

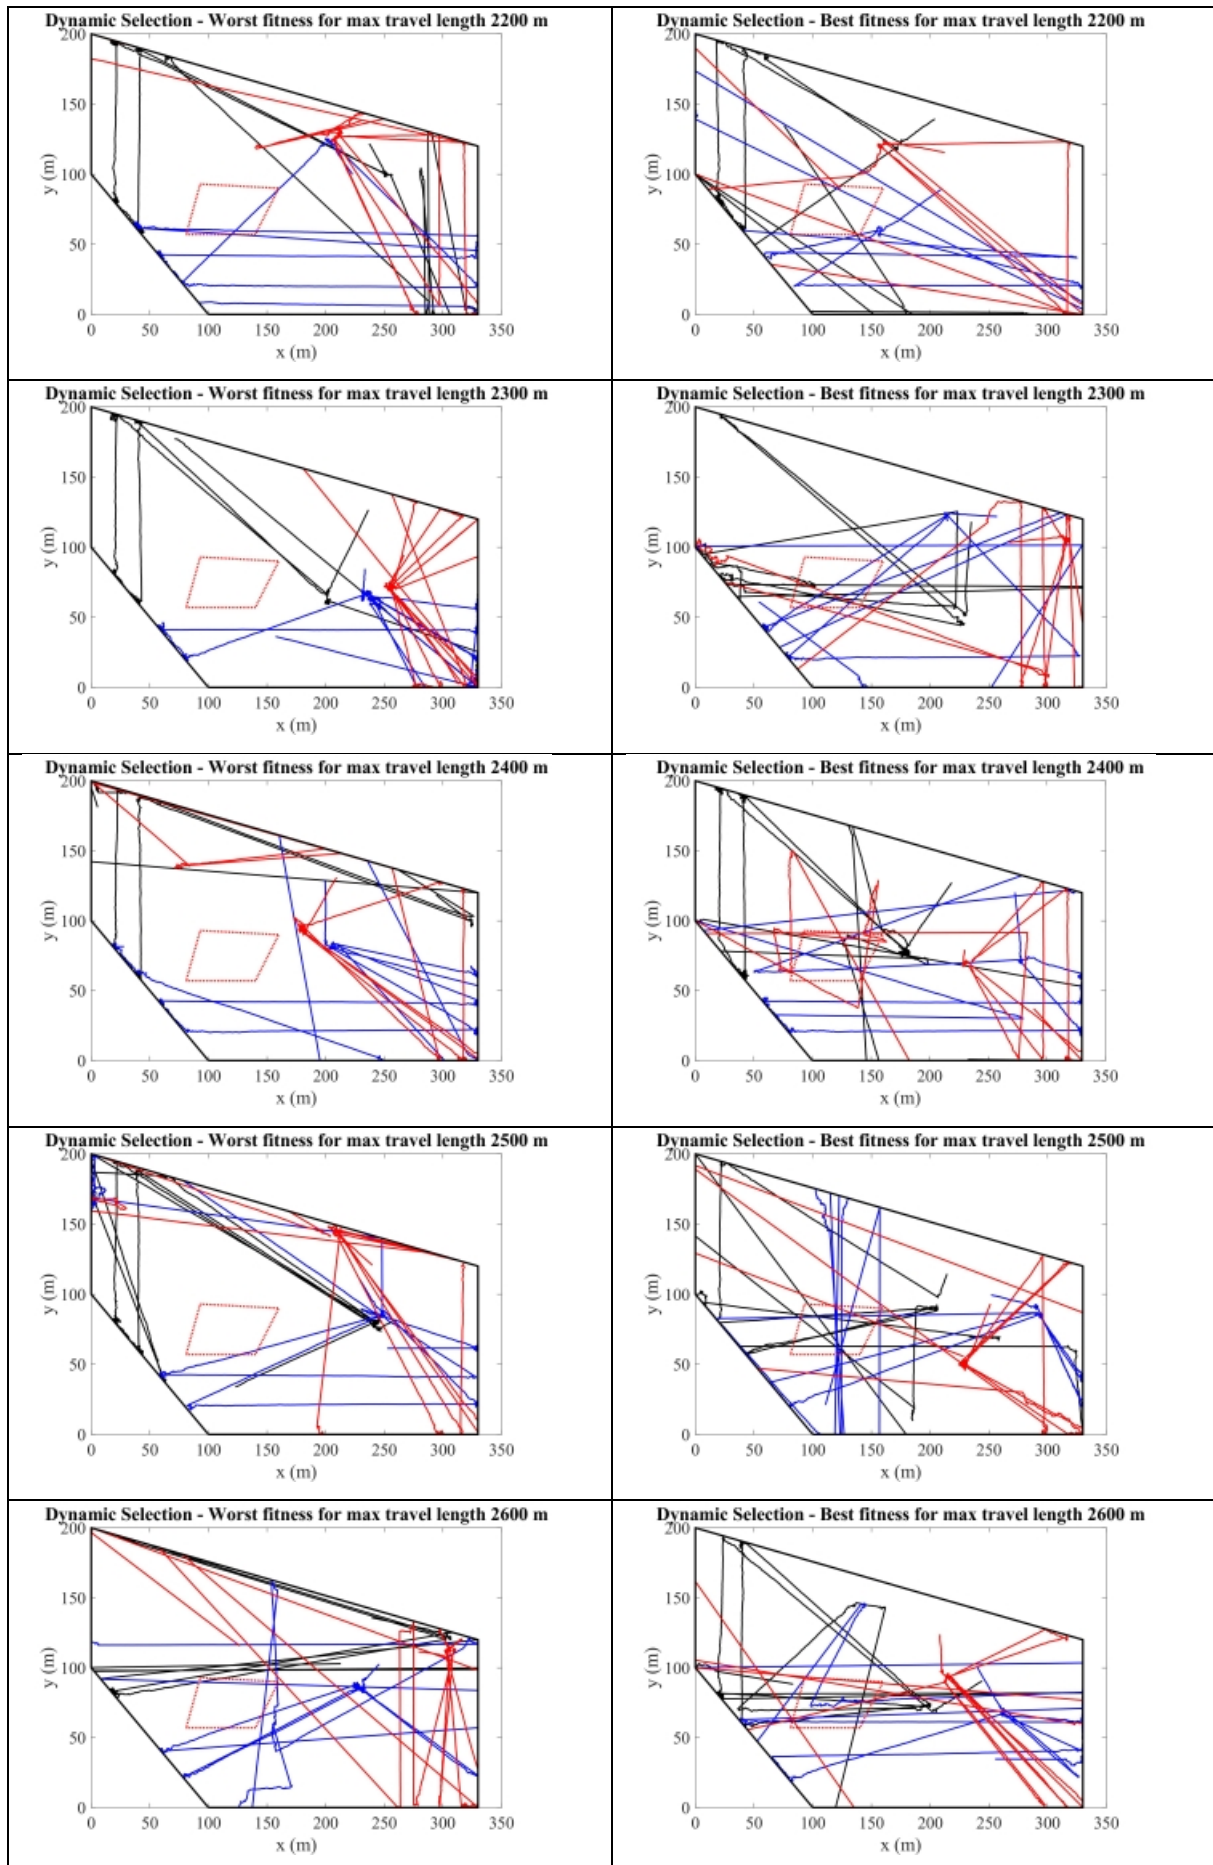

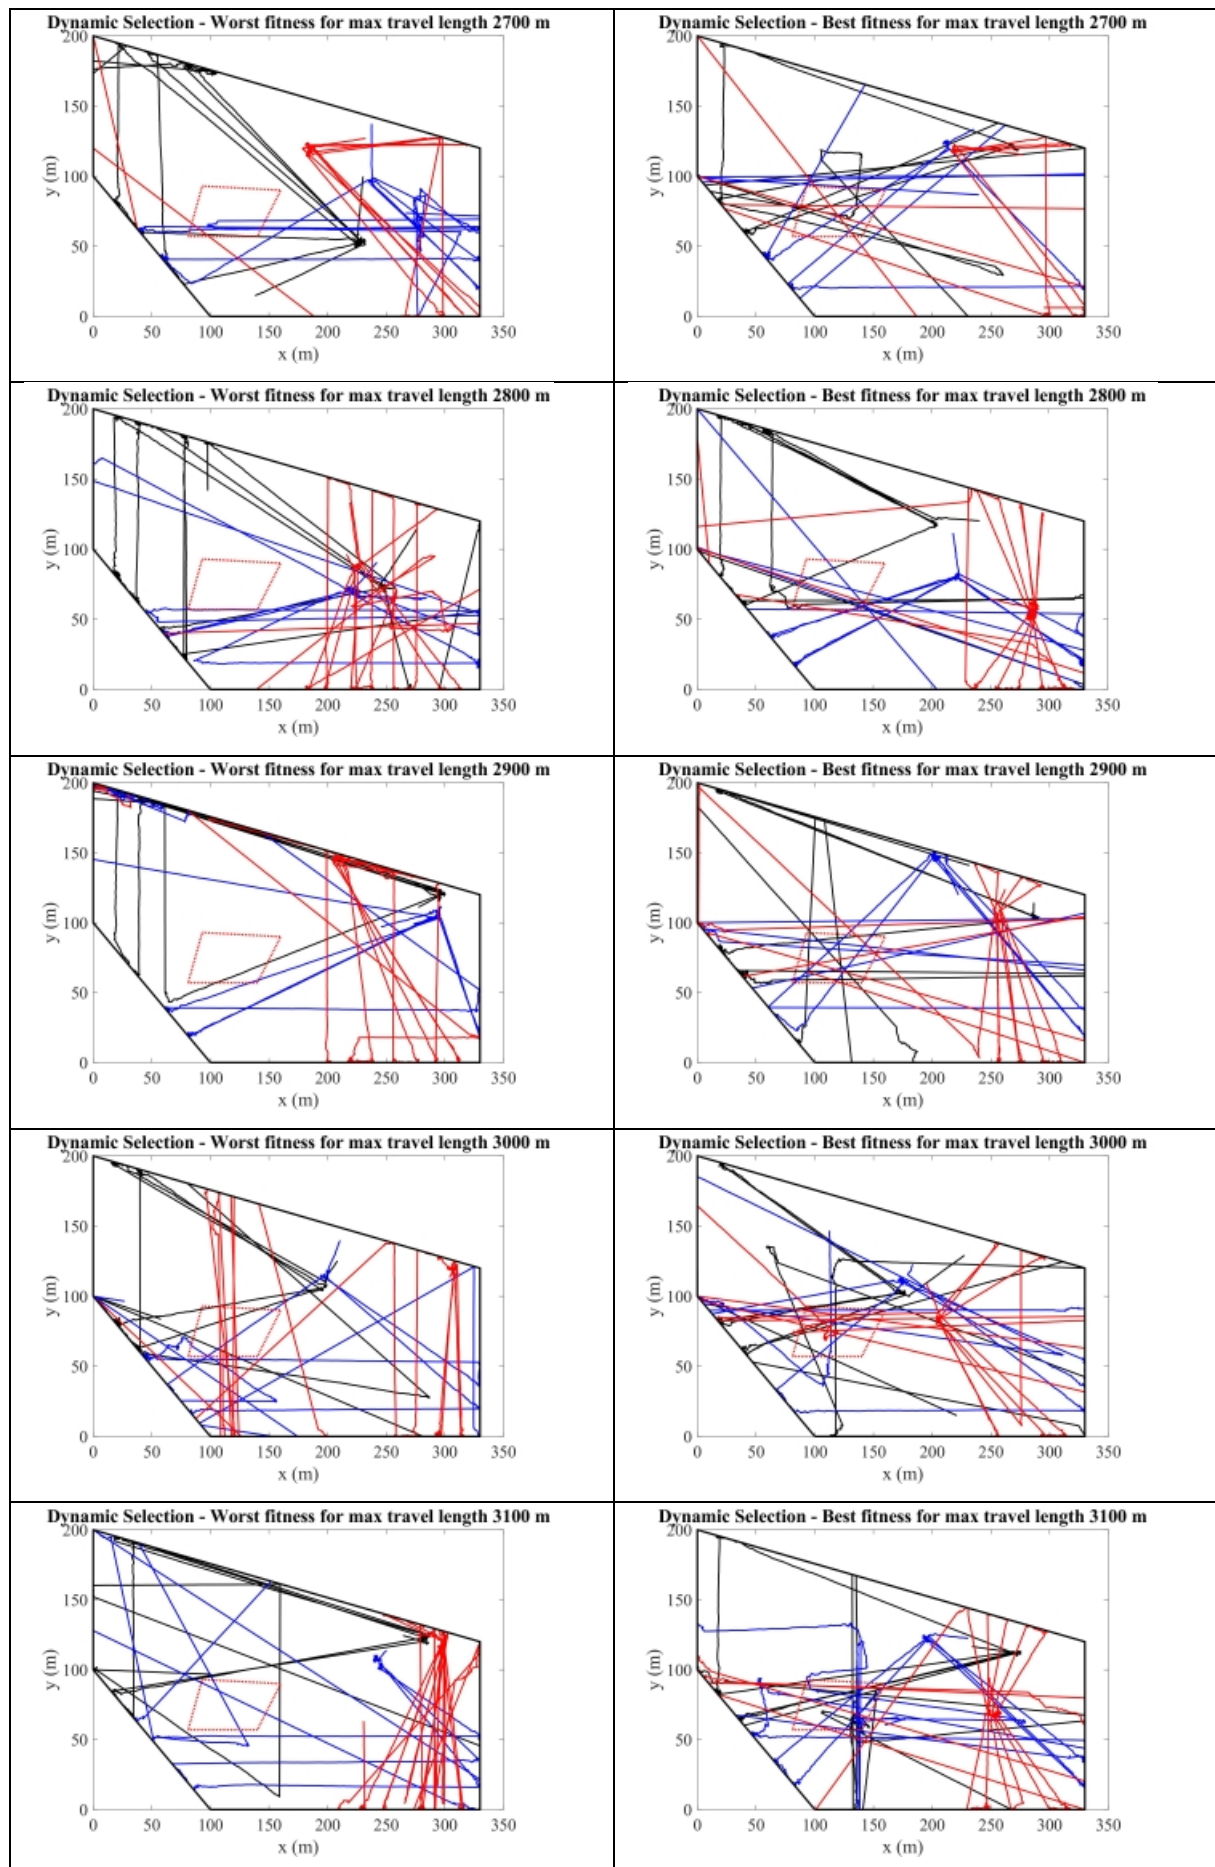

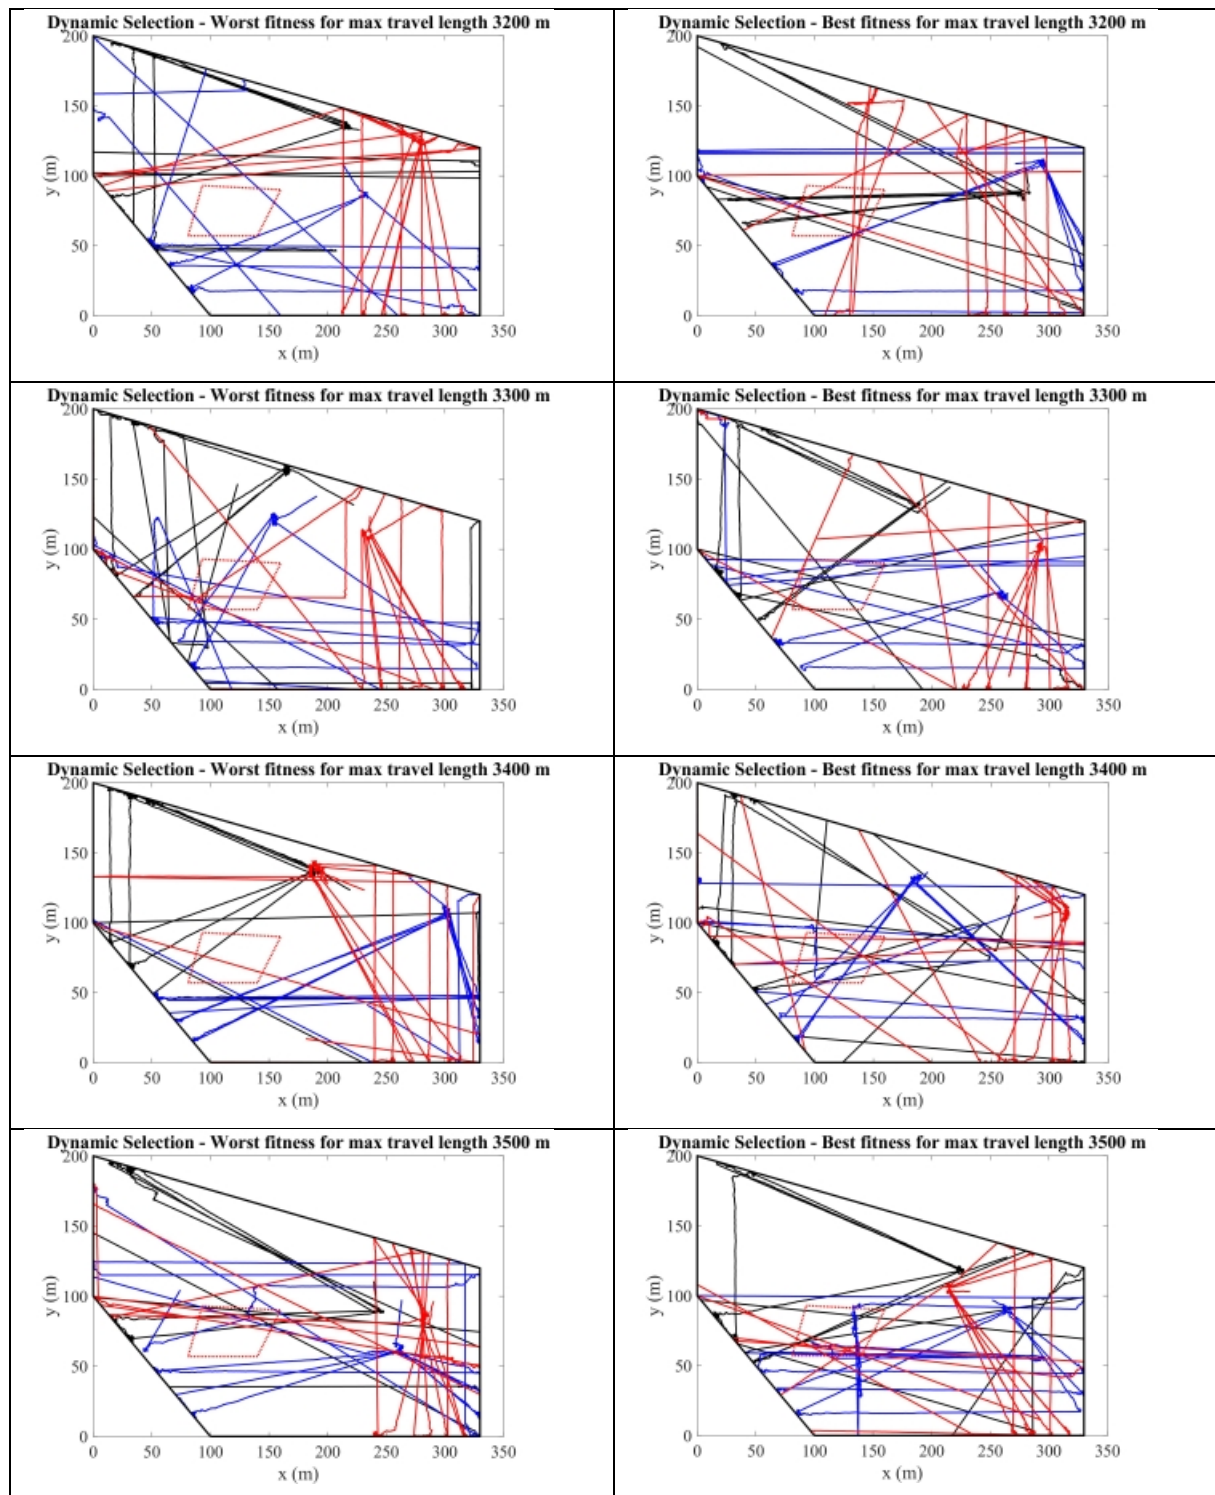

Supplement: s1 [file s1 › S3 AUV_Paths.pdf]
